# Supplementary material for: The N300: An Index For Predictive Coding Of Complex Visual Objects and Scenes
Source: bioRxiv or medRxiv preprint supplement (doi:10.1101/2020.09.21.304378), 2021-04-13
Supplement: Supplementary file [file media-1.pdf]

1 **The N300: An Index For Predictive Coding Of Complex Visual Objects and Scenes**

2

3 Manoj Kumar, Kara D. Federmeier, Diane M. Beck

4

5 Corresponding Author: Manoj Kumar

6 **Email:** [mk35@princeton.edu](mailto:mk35@princeton.edu)

7

## 8 **Supplementary Materials**

### 9 **Experiment 1**

#### 10 **N300 Distributional Analysis**

11 To compare the N300 in our experiment with its characterization in the existing literature, we  
12 performed an ANOVA in the time-window 250-350 ms with the factor of representativeness  
13 (Good/Bad) and dividing the 16 scalp channels into 3 additional factors: 2 levels of Hemisphere  
14 (right and left scalp sites), 2 levels of Laterality (lateral and medial scalp sites), and 4 levels of  
15 Anteriority (prefrontal, frontal, central/parietal, and occipital scalp sites). In addition to confirming  
16 the main effect of Good vs. Bad (bad larger than good) ( $F(1,19) = 11.97$ ;  $p = 0.0026$ ,  $E = 1$ ), there  
17 were interactions of Good/Bad with both Laterality ( $F(1,19) = 7.35$ ;  $p = 0.014$ ;  $E = 1$ ) and Anteriority  
18 ( $F(3,57) = 27.86$ ;  $p < 0.0001$ ;  $E = 0.5336$ ), as well as three-way interactions: Good/Bad x  
19 Hemisphere x Anteriority ( $F(3,57) = 3.13$ ;  $p = 0.0324$ ;  $E = 0.8353$ ), and Good/Bad x Laterality x  
20 Anteriority ( $F(3,57) = 6.79$ ;  $p = 0.0005$ ;  $E = 0.7571$ ). Overall, N300 responses were observed over  
21 both left and right hemisphere sites and were largest over the front of the head and larger over  
22 medial compared to lateral electrode sites. Over frontal sites, the effect of Laterality was more  
23 pronounced and there was a tendency for larger effects over left compared to right hemisphere  
24 sites. These results show that the topographic distribution of the N300 effect for natural scenes  
25 has a similar distributional profile as the N300 for objects (Schendan & Kutas, 2002, 2003,  
26 2007).

#### 27 **Post N300 Components**

28 Analyses of the N400 and LPC are presented in Tables S1 and S2.

29 **Table S1.** The grand average mean values in the N400 time-window (350-500 ms), shown for  
 30 11 frontal electrode sites along with t-test and Bayes factor values. The N400 for the bad  
 31 exemplars is larger (more negative) than that for the good exemplars. The t- test and Bayes  
 32 factor calculations compared the within-subject Good/Bad difference to 0.

| Condition | N  | Mean<br>( $\mu\text{V}$ ) | Bad/Good<br>Difference<br>Mean<br>( $\mu\text{V}$ ) | Bad/Good<br>Difference 95%<br>C.I. | t(19) | p      | Bayes<br>Factor |
|-----------|----|---------------------------|-----------------------------------------------------|------------------------------------|-------|--------|-----------------|
| Bad       | 20 | -3.3 $\pm$ 0.96           | -1.14                                               | -1.78 to -0.50                     | -3.74 | 0.0014 | 27.3            |
| Good      | 20 | -2.2 $\pm$ 0.96           |                                                     |                                    |       |        |                 |

33 Note:  $\pm$  values reflect the normed standard deviation within subjects.

34

35 **Table S2:** The grand average mean values, in the LPC time-window (500-800 ms), shown for  
 36 15 posterior electrode sites (LMCe, RMCE, LDCe, RDCe, MiCe, MiPa, LLTe, RLTe, LDPa,  
 37 RDPa, LLOc, RLOc, LMOc, RMOc, MiOc) along with t-test and Bayes factor values. The LPC  
 38 for bad exemplars has a smaller mean amplitude than for the good exemplars. The t- test and  
 39 Bayes factor calculations compared the within subject Good/Bad difference to 0.

| Condition | N  | Mean<br>( $\mu\text{V}$ ) | Bad/Good<br>Difference<br>Mean<br>( $\mu\text{V}$ ) | Bad/Good<br>Difference 95%<br>C.I. | t(19) | p      | Bayes<br>Factor |
|-----------|----|---------------------------|-----------------------------------------------------|------------------------------------|-------|--------|-----------------|
| Bad       | 20 | 3.3 $\pm$ 1.1             | -1.17                                               | -1.91 to -0.43                     | -3.3  | 0.0036 | 12.1            |
| Good      | 20 | 4.5 $\pm$ 1.1             |                                                     |                                    |       |        |                 |

40 Note:  $\pm$  values reflect the normed standard deviation within subjects.

41  
42 **ERP Analysis Conditioned on Participants' Judgements**

43  
44 To examine the N300 effect conditionalized on participants' explicit judgements, we repeated  
45 the Bayes factor analysis, but now only using trials wherein participants' judgments aligned with  
46 the condition designation (i.e., good exemplars judged as good and bad exemplars judged as  
47 bad). As can be seen in **Table S3**, using the same time window and same set of electrode sites,  
48 we again find a good/bad N300 effect for this subset of trials (Bayes Factor = 5.4;  $t = -2.89$ ,  $p =$   
49  $0.009$ ). The post-N300 components, the N400 and LPC, also show significant effects for this  
50 subset of trials, albeit with reduced Bayes factors.

51 **Table S3.** The grand average mean values along with t-test and Bayes factor values, only for  
52 trials in which participants marked good exemplars as good or bad exemplars as bad, for the  
53 N300 and post N300 components. This analysis was carried out at identical electrode sites to  
54 the corresponding analyses in Tables 1, S1, and S2. The t- test and Bayes factor calculations  
55 compared the within-subject Good/Bad difference to 0.

56

| ERP  | Condition | N  | Mean ( $\mu$ V) | Bad/Good Difference Mean ( $\mu$ V) | Bad/Good Difference 95% C.I. | t(19) | p      | Bayes Factor |
|------|-----------|----|-----------------|-------------------------------------|------------------------------|-------|--------|--------------|
| N300 | Bad       | 20 | -6.4 $\pm$ 1.03 |                                     |                              |       |        |              |
|      | Good      | 20 | -5.4 $\pm$ 1.03 | -0.95                               | -1.63 to -0.26               | -2.89 | 0.0094 | 5.4          |
| N400 | Bad       | 20 | -3.2 $\pm$ 1.51 |                                     |                              |       |        |              |
|      | Good      | 20 | -2.1 $\pm$ 1.51 | -1.02                               | -2.01 to -0.02               | -2.13 | 0.046  | 1.5          |

|     |      |    |          |       |               |       |        |     |
|-----|------|----|----------|-------|---------------|-------|--------|-----|
|     | Bad  | 20 | 3.2±1.67 |       |               |       |        |     |
| LPC | Good | 20 | 4.4±1.67 | -1.20 | -2.3 to -0.09 | -2.26 | 0.0359 | 1.8 |

---

57

58

59 **Comparing the N300 to Bad Exemplars Judged as Good or Bad**

60 Bad exemplars (designated based on large-scale rating data) were explicitly judged to be bad  
61 by participants in this study about half the time (mean = 56.2%, std. dev = 15.6%). We  
62 compared the N300 amplitude to these exemplars based on participants' judgments and found  
63 no evidence that the N300 differs for bad exemplar trials that subjects responded to as "bad"  
64 (-6.35  $\mu$ V) vs. "good" (-6.37  $\mu$ V) (Bayes Factor = 0.23;  $t(19) = 0.04$ ;  $p = 0.97$ ). Participant  
65 judgements also did not reliably modulate either the N400 (Bayes Factor = 0.23;  $t(19) = 0.16$ ,  $p$   
66 = 0.88) or the LPC (Bayes Factor = 0.29;  $t(19) = -0.71$ ;  $p = 0.48$ ). Thus, we see no indication  
67 that the ERP patterns were importantly affected by participants' explicit judgments, although we  
68 note that this analysis is conducted on half the trials of the main analysis. Because judgments  
69 for the good exemplars were much more consistent (mean judged to be "good" = 86.2%, std.  
70 dev = 13.9%), there were insufficient trials to examine the impact of participant judgment for  
71 these items.

72

73 **Experiment 2**

74

75 **N300 Distributional Analysis with Cuing**

76 A novel feature of **Experiment 2** was the use of a verbal precue. To see how the distributional  
77 properties of the N300 effect under cued conditions compare to that in prior work, we performed  
78 an ANOVA of the Cueing (match/mismatch) and Good/Bad factors using the same electrode  
79 sites as in the ANOVA analysis for **Experiment 1**, adding the identical electrode factors: 2

80 levels of Hemisphere (right and left scalp sites), 2 levels of Laterality (lateral and medial scalp  
81 sites), and 4 levels of Anteriority (prefrontal, frontal, central/parietal, and occipital scalp sites).  
82 We replicate the main effect of Good and Bad from **Experiment 1**, with larger N300 responses  
83 to bad exemplars than to good;  $F(1,19) = 15.34$ ;  $p = 0.0009$ ,  $E=1$ . The topographic distribution of  
84 this effect was also similar to that in **Experiment 1** and in the larger N300 literature: N300  
85 effects were observed over both left and right hemisphere sites, with the left hemisphere  
86 showing somewhat larger effects as compared to the right hemisphere (Good/Bad x  
87 Hemisphere ( $F(1,19) = 5$ ;  $p = 0.0375$ ,  $E=1$ ) and were larger over medial than lateral sites  
88 (Good/Bad x Laterality ( $F(1,19) = 21.1$ ;  $p = 0.0002$ ,  $E=1$ ) and larger over the front of the head  
89 (Good/Bad x Anteriority ( $F(3,57) = 7.13$ ;  $p = 0.0004$ ,  $E=0.4030$ )).

90

91 We also found an interaction of Good/Bad x Cueing ( $F(1,19) = 5.87$ ;  $p = 0.0255$ ,  $E=1$ ), with large  
92 N300 effects when the stimuli matched the cue, but negligible effects in the mismatch condition.  
93 There was a 3-way interaction of Good/Bad x Cueing x Laterality ( $F(1,19) = 4.83$ ;  $p = 0.0406$ ,  
94  $E=1$ ), because the tendency for N300 effects to be larger over medial than lateral sites was  
95 more apparent in the match condition, which showed strong N300 effects.

96

#### 97 **N400: The Effects of Cuing**

98

99 The N400 is known to be affected by semantic expectancy. To confirm that pattern and examine  
100 its interaction with Good/Bad status in **Experiment 2**, we performed an ANOVA analysis in the  
101 N400 time-window (350-500 ms). Consistent with the larger literature, we found a main effect of  
102 Cuing ( $F = 5.43$ ;  $p = 0.03$ ;  $E = 1$ ) with a smaller N400 amplitude to stimuli that matched the cue  
103 compared to the those that mismatched. We also found a significant interaction of Good/Bad x  
104 Cuing ( $F = 13.7$ ;  $p = 0.0015$ ;  $E = 1$ ), with the good exemplars in the match condition having the  
105 smallest amplitude as compared to the good and bad exemplars in the match- and- mismatched

106 condition. Note that we do not claim that these effects in the N400 time window are completely  
 107 independent of the preceding N300 effects in our experiment. Prior work has shown that the  
 108 N300 and N400 are functionally dissociable (Federmeier & Kutas, 2002; Gratton et al., 2009),  
 109 but their similar response pattern to, e.g., incongruent and congruent items, can make  
 110 separating them challenging under some circumstances (Draschkow et al., 2018). We also  
 111 computed the Bayes factor for the N400 in the match and mismatch conditions (**Table S4**) and  
 112 we see strong evidence for the N400 in the match condition (Bayes factor 1287.4) as compared  
 113 to the mismatch condition (Bayes factor 0.56).

114  
 115

116 **Table S4.** The grand average mean values, in the N400 time-window (350-500 ms), shown for  
 117 11 frontal electrode sites. The t- test and Bayes factor calculations compared the within subject  
 118 Good/Bad difference to 0.

| Condition | Cue      | N  | Mean<br>( $\mu$ V) | Difference<br>( $\mu$ V) | Bad/Good<br>Difference 95%<br>C.I. | t(19) | p       | Bayes<br>Factor |
|-----------|----------|----|--------------------|--------------------------|------------------------------------|-------|---------|-----------------|
| Bad       | Match    | 20 | -5.3 $\pm$ 0.98    |                          |                                    |       |         |                 |
| Good      | Match    | 20 | -3.5 $\pm$ 1.41    | -1.82                    | -2.5 to -1.15                      | -5.67 | 1.8E-05 | 1287.4          |
| Bad       | Mismatch | 20 | -4.7 $\pm$ 1.65    |                          |                                    |       |         |                 |
| Good      | Mismatch | 20 | -5.6 $\pm$ 2.06    | 0.91                     | -0.42 to 2.25                      | -1.44 | 0.17    | 0.56            |

119

120 Note:  $\pm$  values reflect the normed standard deviation within subjects.

121  
 122

123 **LPC**

124 For the LPC, we examined differences in the 500-800 ms time window, encompassing the Late  
 125 Positive Complex (LPC), over 15 posterior sites (identical to the sites for the analysis in  
 126 **Experiment 1**). We replicate the main effect of Good/Bad with a larger LPC amplitude for good  
 127 as compared to bad exemplars ( $F = 4.84$ ;  $p = 0.0403$ ;  $E = 1$ ). The LPC is known to index  
 128 confidence in decision making (Finnigan et al., 2002) and the main effect of Cuing in  
 129 **Experiment 2** aligns with this understanding, with the match condition showing a larger LPC  
 130 amplitude as compared to the mismatch condition ( $F = 19.69$ ;  $p = 0.0003$ ;  $E = 1$ ). The interaction  
 131 of Good/Bad x Cuing is also significant ( $F = 19.82$ ;  $p = 0.0003$ ;  $E = 1$ ) with the good match having  
 132 the largest LPC amplitude as compared to the Good mismatch, Bad match, and Bad mismatch  
 133 conditions. We also computed the Bayes factor for the LPC in the match and mismatch  
 134 conditions (Table S5) and we see strong evidence for the LPC in the match condition (Bayes  
 135 factor 9014.4) as compared to the mismatch condition (Bayes factor 0.41).

136

137

138 **Table S5.** The grand average mean values, in the LPC time-window (500-800 ms), shown for  
 139 15 posterior electrode sites. The t- test and Bayes factor calculations compared the Good/Bad  
 140 difference to 0.

| Condition | Cue      | N  | Mean ( $\mu V$ ) | Mean Bad/Good Difference ( $\mu V$ ) | Bad/Good Difference 95% C.I. | t(19) | p       | Bayes Factor |
|-----------|----------|----|------------------|--------------------------------------|------------------------------|-------|---------|--------------|
| Bad       | Match    | 20 | 0.4±0.98         | -2.24                                | -2.94 to -1.54               | -6.69 | 2.1E-06 | 9014.4       |
| Good      | Match    | 20 | 2.7±1.09         |                                      |                              |       |         |              |
| Bad       | Mismatch | 20 | 0.9±1.66         | 0.68                                 | -0.56 to 1.93                | 1.15  | 0.26    | 0.41         |
| Good      | Mismatch | 20 | 0.2±1.61         |                                      |                              |       |         |              |

141



142 Note:  $\pm$  values reflect the normed standard deviation within subjects.

143

#### 144 ERP Analyses Conditioned on Participants' Judgements

145 As for Experiment 1, we also examined Good/Bad effects conditionalized on participants'  
146 explicit judgements, only including exemplars on which subjects judgement was congruent with  
147 the category cue; i.e., they responded to a cue congruent stimulus as 'Yes' and cue incongruent  
148 stimulus as "No", for both good and bad exemplars. As can be seen in **Table S6**, we again  
149 found that explicit judgments did not notably impact the ERP patterns.

150

151 **Table S6.** The grand average mean values along with t-test and Bayes factor values, only for  
152 trials in which participants responded to a cue congruent stimulus as 'Yes' and cue incongruent  
153 stimulus as "No", for both good and bad exemplars. This analysis was carried out at identical  
154 electrode sites to the corresponding analyses in Tables 2, S1, and S2. The t- test and Bayes  
155 factor calculations compared the within-subject Good/Bad difference to 0.

156

| ERP  | Condition | Cue      | N  | Mean ( $\mu$ V) | Difference ( $\mu$ V) | Bad/Good Difference 95% C.I. | t(19) | p       | Bayes Factor |
|------|-----------|----------|----|-----------------|-----------------------|------------------------------|-------|---------|--------------|
| N300 | Bad       | Match    | 20 | -7.2 $\pm$ 1.18 |                       |                              |       |         |              |
|      | Good      | Match    | 20 | -5.1 $\pm$ 1.24 | -2.15                 | -2.98 to -1.33               | -5.45 | 2.9E-05 | 835.8        |
|      | Bad       | Mismatch | 20 | -6.5 $\pm$ 1.68 |                       |                              |       |         |              |
|      | Good      | Mismatch | 20 | -5.9 $\pm$ 1.48 | -0.55                 | -1.72 to 0.63                | -0.98 | 0.34    | 0.35         |
| N400 | Bad       | Match    | 20 | -5.3 $\pm$ 1.18 |                       |                              |       |         |              |
|      | Good      | Match    | 20 | -3.6 $\pm$ 1.50 | -1.71                 | -2.6 to -0.82                | -4.02 | 0.0007  | 48.2         |

|     |      |          |    |           |       |                |       |         |       |
|-----|------|----------|----|-----------|-------|----------------|-------|---------|-------|
|     | Bad  | Mismatch | 20 | -4.7±1.62 |       |                |       |         |       |
|     | Good | Mismatch | 20 | -5.6±1.91 | 0.92  | -0.37 to 2.21  | 1.49  | 0.15    | 0.6   |
| LPC | Bad  | Match    | 20 | 0.6±1.22  |       |                |       |         |       |
|     | Good | Match    | 20 | 2.6±1.13  | -2.05 | -2.85 to -1.25 | -5.35 | 3.6E-05 | 689.4 |
|     | Bad  | Mismatch | 20 | 1.0±1.76  |       |                |       |         |       |
|     | Good | Mismatch | 20 | 0.2±1.49  | 0.79  | -0.42 to 2.01  | 1.36  | 0.19    | 0.5   |

157

158 Note: ± values reflect the normed standard deviation within subjects.

159

### 160 **N300: Subsampling the Match Trials**

161

162 The mismatch condition in **Experiment 2** had fewer trials and therefore possibly a lower signal-  
 163 to-noise-ratio as compared to the match condition. To verify that we see evidence for the  
 164 Good/Bad effect in the match condition even when trial numbers are equated to the mismatch  
 165 condition, we randomly subsampled, in the match condition, 30 trials from the good exemplars  
 166 and 30 trials from the bad exemplars and recomputed the statistics at identical frontal electrode  
 167 sites. Even with just this subset of trials, we find that N300 amplitudes are larger for bad than for  
 168 good exemplars in the match condition (Bayes Factor = 35.6;  $t=-3.9$ ;  $p=0.001$ ; **Table S7**).

169 Moreover, when we combine the sampled good data with the mismatch data, there is still an  
 170 interaction between Cuing and the Good/Bad effect (Bayes Factor = 3.1), such that the  
 171 Good/Bad effect is reduced under mismatch compared to match conditions.

172

173

174 **Table S7.** The grand average mean values for the N300 and post N300 components for  
 175 subsampled good and bad exemplars (30 trials each) in the match condition, computed at  
 176 identical electrode sites as those used in **Table 2**, **S4** and **S5**. The t- test and Bayes factor  
 177 calculations compared the within subject Good/Bad difference to 0.

178

| ERP  | Condition | Cue   | N  | Mean<br>( $\mu\text{V}$ ) | Difference<br>( $\mu\text{V}$ ) | Bad/Good<br>Difference<br>95% C.I. | t(19) | p      | Bayes<br>Factor |
|------|-----------|-------|----|---------------------------|---------------------------------|------------------------------------|-------|--------|-----------------|
| N300 | Bad       | Match | 20 | -7.9 $\pm$ 1.84           | -2.42                           | -3.74 to -1.1                      | -3.9  | 0.001  | 35.6            |
|      | Good      | Match | 20 | -5.5 $\pm$ 1.77           |                                 |                                    |       |        |                 |
| N400 | Bad       | Match | 20 | -5.8 $\pm$ 1.53           | -1.82                           | -3.03 to -0.62                     | -3.16 | 0.0051 | 8.99            |
|      | Good      | Match | 20 | -4.0 $\pm$ 1.89           |                                 |                                    |       |        |                 |
| LPC  | Bad       | Match | 20 | 0.3 $\pm$ 1.79            | -1.99                           | -3.18 to -0.81                     | -3.52 | 0.002  | 18.0            |
|      | Good      | Match | 20 | 2.3 $\pm$ 1.61            |                                 |                                    |       |        |                 |

179

180 Note:  $\pm$  values reflect the normed standard deviation within subjects.

181

182 **Supplementary Materials: References**

183 Draschkow, D., Heikel, E., Vö, M. L.-H., Fiebach, C. J., & Sassenhagen, J. (2018). No evidence  
 184 from MVPA for different processes underlying the N300 and N400 incongruity effects in  
 185 object-scene processing. *Neuropsychologia*, 120, 9–17.  
 186 <https://doi.org/10.1016/j.neuropsychologia.2018.09.016>

- 187 Federmeier, K. D., & Kutas, M. (2002). Picture the difference: Electrophysiological investigations  
188 of picture processing in the two cerebral hemispheres. *Neuropsychologia*, 40(7), 730–  
189 747. <http://kutaslab.ucsd.edu/people/kutas/pdfs/2002.N.730.pdf>
- 190 Finnigan, S., Humphreys, M. S., Dennis, S., & Geffen, G. (2002). ERP 'old/new' effects: Memory  
191 strength and decisional factor (s). *Neuropsychologia*, 40(13), 2288–2304.  
192 <http://www.sciencedirect.com/science/article/pii/S0028393202001136>
- 193 Gratton, C., Evans, K. M., & Federmeier, K. D. (2009). See what I mean? An ERP study of the  
194 effect of background knowledge on novel object processing. *Memory & Cognition*, 37(3),  
195 277–291. <https://doi.org/10.3758/MC.37.3.277>
- 196 Schendan, H. E., & Kutas, M. (2002). Neurophysiological evidence for two processing times for  
197 visual object identification. *Neuropsychologia*, 40(7), 931–945.  
198 <http://www.sciencedirect.com/science/article/pii/S0028393201001762>
- 199 Schendan, H. E., & Kutas, M. (2003). Time course of processes and representations supporting  
200 visual object identification and memory. *Journal of Cognitive Neuroscience*, 15(1), 111–  
201 135. <http://www.mitpressjournals.org/doi/abs/10.1162/089892903321107864>
- 202 Schendan, H. E., & Kutas, M. (2007). Neurophysiological evidence for the time course of  
203 activation of global shape, part, and local contour representations during visual object  
204 categorization and memory. *Journal of Cognitive Neuroscience*, 19(5), 734–749.  
205 <http://www.mitpressjournals.org/doi/abs/10.1162/jocn.2007.19.5.734>
